# Supplementary material for: Predictors and Outcomes of Early Left Ventricular Dysfunction in Paediatric Patients Postoperative for Ventricular Septal Defect: A Retrospective Cohort Study Based on Myocardial Strain and Work
Source: Research Square preprint supplement (doi:10.21203/rs.3.rs-8154209/v1), 2025-12-16
Supplement: Supplementary file 1 [file 8211497051263db1bf83b110.docx]

**Supplementary Files**

**Supplementary Table Legends**

**Supplementary Table S1. Ross heart failure classification assessment questionnaire for paediatric patients (0-14 years) with congenital heart disease.**

**Supplementary Table S2. Comparison of baseline clinical and echocardiographic characteristics in patients with LV dysfunction defined by different LVEF thresholds.**

**Supplementary Table S3 Univariable logistic regression evaluation of predictors of postoperative LV dysfunction.**

**Supplementary Table S4. Diagnostic efficacy of ultrasound LV GLS, GWI, and GWE for LV dysfunction based on different LVEF thresholds.**

**Supplementary Table S5. Pre- and postoperative cardiac function parameters changes between two groups.**

**Supplementary Figure Legends**

**Supplementary Figure S1. Study flow chart.**

VSD, ventricular septal defect; CHD, congenital heart disease; sPAP, systolic pulmonary arterial pressure; LVEF, left ventricular ejection fraction.

**Supplementary Figure S2. Representative cases of pre- to postoperative changes in LV GWI in patients with(a-e) and without (f-j) postoperative LV dysfunction.**

LV, left ventricular; GWI, global work index.

**Supplementary Figure S3. Bland–Altman Plot of the Inter- and intra-observer variability in myocardial strain and work myocardial parameters.**

LVEF, left ventricular ejection fraction; LV, left ventricular; GLS, global longitudinal strain; GWI, global work index; GWE, global work efficiency.

**Supplementary Table S1 Ross heart failure classification assessment questionnaire for paediatric patients (0-14 years) with congenital heart disease.**

| Section | Item | Response Options |
| --- | --- | --- |
| A. Patient Information |  |  |
|  | 1. Child's Name | Free text: _______________ |
|  | 2. Age (Years/Months) | ____ Y ____ M |
|  | 3. Primary Cardiac Diagnosis | Free text: _______________ |
|  | 4. Date of Completion | DD/MM/YYYY |
| B. Core Symptoms (All Ages) |  |  |
|  | 1. Tachypnea/Dyspnea at rest | ☐ No  ☐ Yes (Frequency: ☐ Rarely ☐ Occasionally ☐ Frequently ☐ Constantly)  Manifestations: ☐ RR >___/min ☐ Nasal flaring ☐ Retractions ☐ Grunting ☐ Requires O₂ |
|  | Dyspnea during |  |
|  | - Feeding/Eating | ☐ None ☐ Mild ☐ Moderate ☐ Severe |
|  | - Crying | ☐ None ☐ Mild ☐ Moderate ☐ Severe |
|  | - Playing | ☐ None ☐ Mild ☐ Moderate ☐ Severe |
|  | - Walking/Stairs (if ambulatory) | ☐ None ☐ Mild ☐ Moderate ☐ Severe |
|  | 2. Fatigue/Lethargy | ☐ More fatigued than peers (Y/N/Uncertain)  ☐ Shorter activity duration (Y/N/Uncertain)  ☐ Requires frequent rests (Y/N/Uncertain) |
|  | 3. Edema | ☐ No  ☐ Yes (Location: ☐ Periorbital ☐ Facial ☐ Hands/Feet ☐ Other: _________) |
|  | 4. Skin/Lip Color | ☐ Cyanosis/pallor at rest/activity (Y/N/Uncertain) |
|  | 5. Sleep Disturbance | ☐ Requires upright position (Y/N)  ☐ Nocturnal dyspnea/restlessness (☐ Never ☐ Occasionally ☐ Frequently) |
| C. Infant/Toddler Specific (<1.5-2 Years) | |  |
|  | 6. Feeding Difficulty |  |
|  | - Labored breathing/coughing | ☐ None ☐ Mild ☐ Moderate ☐ Severe |
|  | - Profuse sweating | ☐ None ☐ Mild ☐ Moderate ☐ Severe |
|  | - Irritability/refusal to suck | ☐ None ☐ Mild ☐ Moderate ☐ Severe |
|  | - Feed duration | ☐ Normal ☐ Slightly prolonged (<10 min extra) ☐ Moderately prolonged (>10 min extra) ☐ Severely prolonged (>30 min/unable) |
|  | - Reduced volume intake | ☐ Yes ☐ No ☐ Uncertain |
|  | - Poor weight gain/loss | ☐ Yes ☐ No (If yes, specify trend: _________ g/day/week) |
|  | 7. Growth Velocity | ☐ Normal ☐ Slightly slow ☐ Significantly slow  Quantify: _________ g/day/week (if known) |
|  | 8. Diaphoresis | (Severity at: ☐ Rest: None/Mild/Mod/Severe ☐ Feeding: None/Mild/Mod/Severe ☐ Activity: None/Mild/Mod/Severe) |
| D. Older Child Specific (≥1.5-2 Years) | |  |
|  | 9. Exercise Tolerance |  |
|  | - Play intensity vs. peers | ☐ Fully equivalent ☐ Slightly less ☐ Significantly less ☐ Almost unable |
|  | - Walking distance | ☐ Equivalent ☐ Slightly shorter ☐ Much shorter ☐ Unable |
|  | - Stair climbing capacity | ☐ >2 flights ☐ 1-2 flights ☐ <½ flight ☐ Unable |
|  | - PE/vigorous play participation | ☐ Normal ☐ Tires easily ☐ Mild activity only ☐ Unable |
|  | 10. Life Impact | (Limitations in: ☐ School: Never/Occas/Freq ☐ Hobbies: Never/Occas/Freq ☐ Peer play: Never/Occas/Freq ☐ ADLs: Never/Occas/Freq) |
| E. Caregiver Assessment |  |  |
|  | 11. Overall Health Status | ☐ Excellent ☐ Good ☐ Fair ☐ Poor ☐ Very Poor |
|  | 12. Functional Impact | ☐ None ☐ Mild ☐ Moderate ☐ Severe ☐ Very Severe |
|  | 13. Open Description Top 1-2 symptoms, triggers & impact | Free text: _______________ |

RR: respiratory rate (breaths/min); **ADLs:** activities of daily living (dressing, grooming);

****Age Adaptation:****Prioritize ****Section C**** for infants (<1.5-2 years) and ****Section D**** for older children (≥1.5-2 years).

**Ross classification criteria (integrated assessment):**

**Class I:** No symptoms in any section. Normal activity/feeding.

**Class II:** Symptoms only with moderate exertion (older) or mild feeding difficulty (infants). Minimal life impact.

**Class III:** Symptoms with minimal activity (older) or significant feeding compromise (infants). Moderate life impact.

**Class IV:** Symptoms at rest. Severe feeding intolerance/growth failure (infants). Unable to perform ADLs.

**Supplementary Table S2 Comparison of baseline echocardiographic characteristics in patients with LV dysfunction defined by different LVEF thresholds.**

| Variables | Postoperative  LVEF≥55%  (n=327) | Postoperative  50%≤LVEF<55%  (n=30) | Postoperative  40%≤LVEF<50%  (n=32) | Postoperative LVEF<40%  (n=20) | *P*-value |
| --- | --- | --- | --- | --- | --- |
| **VSD features and complications** | | | | | |
| VSD type 1/2/3/4 ,n(%) | 262 (80.1)/0 (0.0)/7 (2.1)/58 (17.7) | 22 (73.3)/1 (3.3)/0 (0.0)/7 (23.3) | 24 (75.0)/1 (3.1)/2 (6.3)/5 (15.6) | 17 (85.0)/0 (0.0)/1 (5.0)/2 (10.0) | 0.074 |
| VSD size I/II/III,n(%) | 129 (39.5)/152 (46.5)/46 (14.1) | 4 (13.3)/5 (16.7)/21 (70.0)a | 0 (0.0)/5 (15.6)/27 (84.4)a | 0 (0.0)/2 (10.0)/18 (90.0)a | ＜0.001 |
| sPAP class None/I/II/III,n(%) | 271 (82.9)/16 (4.9)/20 (6.2)/20 (6.1) | 8 (26.7)/4 (13.3)/8 (26.7)/10 (33.3)a | 4 (12.5)/3 (9.4)/9 (28.1)/16 (50.0)a | 4 (20.0)/0 (0.0)/3 (15.0)/13 (65.0)a | ＜0.001 |
| MR 3+ ~ 4+ ,n(%) | 4 (1.2) | 1 (3.3) | 1 (3.1) | 2 (10.0)a | 0.036 |
| TR 3+ ~ 5+ ,n(%) | 2 (0.6) | 2 (6.7)a | 1 (3.1) | 1 (5.0) | 0.015 |
| **Echocardiographic parameters** | | | | | |
| IVSd, mm | 5.0 ± 0.9 | 5.2 ± 1.1 | 4.9 ± 0.8 | 4.4 ± 0.6abc | 0.009 |
| LVPWd, mm | 5.0 ± 0.9 | 5.1 ± 1.1 | 4.9 ± 0.7 | 4.2 ± 0.5abc | 0.001 |
| LVEDVi, mL/m2 | 53.6 ± 18.3 | 76.6 ± 34.6a | 78.1 ± 32.1a | 77.6 ± 22.3a | ＜0.001 |
| CIz | 3.2 ± 1.9 | 5.4 ± 2.1a | 5.7 ± 1.5a | 6.7 ± 1.6ab | ＜0.001 |
| FS, % | 36.1 ± 3.3 | 37.1 ± 2.5 | 35.4 ± 3.3 | 35.2 ± 4.4 | 0.133 |
| LVEF, % | 66.7 ± 4.2 | 68.2 ± 3.4 | 66.4 ± 4.3 | 66.1 ± 5.7 | 0.235 |
| PSD, ms | 29.2 (24.8,36.3) | 29.5 (25.0,34.5) | 31.5 (28.3,40.3) | 29.0 (24.5,31.8) | 0.187 |
| LV GLS, % | 21.2 ± 3.0 | 20.2 ± 3.5 | 19.7 ± 3.5a | 18.7 ± 3.7a | ＜0.001 |
| LV GWI, mmHg% | 1429 ± 304 | 1225 ± 403a | 1177 ± 301a | 1009 ± 255a | ＜0.001 |
| LV GCW, mmHg% | 1899 ± 352 | 1762 ± 423a | 1618± 326a | 1512 ± 351a | ＜0.001 |
| LV GWW,mmHg% | 67 (49, 94) | 76 (50, 112) | 89 (64 ,139)a | 78 (60, 106) | 0.017 |
| LV GWE, % | 96 (94, 97) | 95(91, 96) | 93 (91, 95)a | 94 (93, 95)a | ＜0.001 |

Statistics are mean ± standard deviation, median (IQR), or number (%).

VSD, ventricular septal defect; sPAP, systolic pulmonary arterial pressure; MR, Mitral regurgitation; TR, Tricuspid regurgitation; VSD type1, Central perimembranous; VSD type2, Inlet; VSD type3, Trabecular Musucular; VSD type4, Outlet; VSD size I, Small; VSD size II, Moderate; VSD size III, Large; sPAP class I, Mild; sPAP class II, Moderate; sPAP class III, Severe; IVSd, interventricular septal end-diastolic thickness; LVPWd, left ventricular posterior wall end-diastolic thickness; LVEDVi, left ventricular end-diastolic volume index; FS, shortening fraction; CIz, Cardiac index Z-score; LVEF, left ventricular ejection fraction; PSD, peak strain dispersion; LV, left ventricular; GLS, global longitudinal strain; GWI, global work index; GCW, global contractive work; GWW, global waste work; GWE, global work efficiency.

a *P-*value <0.05 vs. Postoperative LVEF≥55% group

b *P-*value <0.05 vs. Postoperative 50%≤LVEF<55% group

c *P-*value <0.05 vs. Postoperative 40%≤LVEF<50% group

**Supplementary Table S3** **Univariable logistic regression evaluation of predictors of postoperative LV dysfunction.**

| Variables | Univariable | |
| --- | --- | --- |
| OR (95% CI) | *P*-value |
| **Demographic and comorbidities** |  |  |
| Age | 0.71 (0.63 ~ 0.81) | <0.001 |
| BSA | 0.03 (0.00 ~ 0.14) | <0.001 |
| HR | 1.04 (1.02 ~ 1.05) | <0.001 |
| CBP time | 1.02 (1.01 ~ 1.02) | <0.001 |
| MR 3+ ~ 4+ | 4.14 (1.01 ~ 16.92) | 0.048 |
| TR 3+ ~ 5+ | 8.33 (1.50 ~ 46.32) | 0.015 |
| Ross class |  |  |
| I | 1.00(ref) |  |
| II | 1.37(0.79-2.38) | 0.258 |
| III | 6.96 (2.34 ~ 20.63) | <0.001 |
| VSD size |  |  |
| I | 1.00(ref) |  |
| II | 2.55 (0.80 ~ 8.09) | 0.113 |
| III | 46.27 (15.97 ~ 134.08) | <0.001 |
| sPAP class |  |  |
| None | 1.00(ref) |  |
| I | 7.41 (2.67 ~ 20.58) | <0.001 |
| II | 16.94 (7.62 ~ 37.66) | <0.001 |
| III | 33.03 (15.79 ~ 69.10) | <0.001 |
| **Echocardiographic data** |  |  |
| LVEDVi | 1.04 (1.03 ~ 1.06) | <0.001 |
| LV GLS (for 1% decrease) | 1.17 (1.08 ~ 1.27) | <0.001 |
| LV GWI (for 100 mmHg% increase) | 0.75 (0.69 ~ 0.82) | <0.001 |
| LV GWE (for 1% increase) | 0.85 (0.80 ~ 0.91) | <0.001 |

CI, confidence interval; BSA, body surface area; HR, heart rate; CPB, Cardiopulmonary bypass time; MR, Mitral regurgitation; TR, Tricuspid regurgitation; VSD, ventricular septal defect; sPAP, systolic pulmonary arterial pressure; LVEDVi, left ventricular end-diastolic volume index; LV,left ventricular; GLS, global longitudinal strain; GWI, global work index; GWE, global work efficiency; VSD size I, Small; VSD size II,Moderate; VSD size III, Large; sPAP class I, Mild; sPAP class II, Moderate; sPAP class III,Severe.

**Supplementary Table S4 Diagnostic efficacy of LVEDVi, VSD size, sPAP, LV GLS, LV GWI, and LV GWE for LV dysfunction based on different LVEF thresholds.**

| Ultrasound Index | Postoperative  LVEF Threshold | AUC (95% CI) | Cut-off Value | Sensitivity (%) | Specificity (%) | *P*-value |
| --- | --- | --- | --- | --- | --- | --- |
| LVEDVi, mL/m2 | LVEF < 55% | 0.776(0.719, 0.832) | 56.9mL/m2 | 0.780 | 0.676 | ＜0.001 |
|  | LVEF < 50% | 0.760(0.692, 0.828) | 57.4mL/m2 | 0.788 | 0644 | ＜0.001 |
|  | LVEF < 40% | 0.772(0.675, 0.868) | 63.96mL/m2 | 0.750 | 0.730 | ＜0.001 |
| VSD size | LVEF < 55% | 0.85(0.802, 0.897) | class III | 0.805 | 0.859 | ＜0.001 |
|  | LVEF < 50% | 0.864(0.821, 0.906) | class III | 0.865 | 0.812 | ＜0.001 |
|  | LVEF < 40% | 0.846(0.786, 0.907) | class III | 0.900 | 0.758 | ＜0.001 |
| sPAP | LVEF < 55% | 0.836(0.781, 0.891) | class I | 0.805 | 0.829 | ＜0.001 |
|  | LVEF < 50% | 0.843(0.781, 0.906) | class I | 0.846 | 0.782 | ＜0.001 |
|  | LVEF < 40% | 0.809(0.699, 0.919) | class II | 0.800 | 0.787 | ＜0.001 |
| LV GLS,% | LVEF < 55% | 0.633(0.566, 0.701) | -21.55% | 0.756 | 0.483 | ＜0.001 |
|  | LVEF < 50% | 0.656(0.579, 0.732) | -21.15% | 0.750 | 0.515 | <0.001 |
|  | LVEF < 40% | 0.671(0.573, 0.769) | -19.95% | 0.600 | 0.625 | 0.010 |
| LV GWI, mmHg% | LVEF < 55% | 0.724(0.661-0.787) | 1314.5mmHg% | 0.732 | 0.630 | ＜0.001 |
|  | LVEF < 50% | 0.759(0.694, 0.823) | 1306.5mmHg% | 0.808 | 0.619 | ＜0.001 |
|  | LVEF < 40% | 0.829(0.758, 0.901) | 1294.5mmHg% | 0.900 | 0.612 | ＜0.001 |
| LV GWE, % | LVEF < 55% | 0.700(0.638-0.763) | 94.5% | 0.585 | 0.709 | ＜0.001 |
|  | LVEF < 50% | 0.735(0.669-0.801) | 94.5% | 0.673 | 0.697 | ＜0.001 |
|  | LVEF < 40% | 0.697(0.596-0.799) | 94.5% | 0.700 | 0.668 | 0.003 |

VSD, ventricular septal defect; LVEF, left ventricular ejection fraction; LVEDVi, left ventricular end-diastolic volume index; sPAP, systolic pulmonary arterial pressure; LV, left ventricular; GLS, global longitudinal strain; GWI, global work index; GWE, global work efficiency.

**Supplementary Table** **S5** **Pre- and postoperative cardiac function parameters changes between two groups.**

| Parameters | Postoperative LVEF≥55%  (n=327) | Postoperative LVEF<55%  (n=82) | *P* between groups | Mean Difference (95%CI) | *P-*value |
| --- | --- | --- | --- | --- | --- |
| **LVEDVi, ml/m²** |  |  |  | 7.55 (3.95 to 11.14) | <0.001 |
| Baseline | 53.3±18.4 | 77.3±30.5 | <0.001 |  |  |
| 1-Month | 46.6±14.4a | 51.9±18.6a | 0.018 |  |  |
| 3-Month | 47.3±13.1a | 52.2±18.8a | 0.017 |  |  |
| 6-Month | 49.0±13.3a | 52.9±14.7a | 0.170 |  |  |
| 12-Month | 50.0±15.5 | 48.9±15.8a | 0.825 |  |  |
| **LVEF, %** |  |  |  | -1.21 (-2.12 to -0.30) | 0.009 |
| Baseline | 66.6±4.2 | 66.7±4.8 | 0.965 |  |  |
| 1-Month | 65.3±3.8a | 61.1±7.5a | <0.001 |  |  |
| 3-Month | 65.5±3.6a | 64.1±5.8ab | 0.023 |  |  |
| 6-Month | 66.2±3.7 | 66.0±4.6bc | 0.881 |  |  |
| 12-Month | 66.1±3.2 | 66.1±3.7b | 0.803 |  |  |
| **LV GLS, %** |  |  |  | 2.32 (1.82 to 2.82) | <0.001 |
| Baseline | -21.2±3.0 | -19.6±3.5 | <0.001 |  |  |
| 1-Month | -17.4±3.6a | -14.3±3.3a | <0.001 |  |  |
| 3-Month | -18.7±3.5ab | -15.9±2.9ab | <0.001 |  |  |
| 6-Month | -19.1±3.0abc | -17.9±2.8abc | <0.001 |  |  |
| 12-Month | -21.0±3.0bcd | -18.4±2.8bc | <0.001 |  |  |
| **LV GWI, mmHg%** |  |  |  | -241.20 (-284.91 to -197.50) | <0.001 |
| Baseline | 1426±303 | 1141±348 | <0.001 |  |  |
| 1-Month | 1184±300a | 943±240a | <0.001 |  |  |
| 3-Month | 1296±306ab | 1066±275b | <0.001 |  |  |
| 6-Month | 1351±301abc | 1136±213b | <0.001 |  |  |
| 12-Month | 1503±318abcd | 1300±264abcd | <0.001 |  |  |
| **LV GCW, mmHg%** |  |  |  | -259.71 (-313.41 to -207.02) | <0.001 |
| Baseline | 1900±350 | 1645±379 | <0.001 |  |  |
| 1-Month | 1566±351a | 1304±323a | <0.001 |  |  |
| 3-Month | 1701±354ab | 1436±328ab | <0.001 |  |  |
| 6-Month | 1759±349abc | 1551±281b | <0.001 |  |  |
| 12-Month | 1980±395abcd | 1704±312bcd | <0.001 |  |  |
| **LV GWW, mmHg%** |  |  |  | 11.25 ( 1.05 to 21.45) | 0.031 |
| Baseline | 67(49, 94) | 81(54, 119) | 0.002 |  |  |
| 1-Month | 91(59, 146)a | 112(81, 202)a | 0.015 |  |  |
| 3-Month | 85(58, 131)a | 86(55, 149)b | 0.890 |  |  |
| 6-Month | 82(56,126)ab | 82(61, 110)b | 0.300 |  |  |
| 12-Month | 73(45, 107)abc | 86(52, 122)b | 0.743 |  |  |
| **LV GWE, %** |  |  |  | -1.59 (-2.29 to-0.89 ) | <0.001 |
| Baseline | 97(95, 98) | 96(93, 97) | <0.001 |  |  |
| 1-Month | 95(91, 96)a | 92(86, 95)a | <0.001 |  |  |
| 3-Month | 95(92, 97)ab | 94(90, 97)b | 0.122 |  |  |
| 6-Month | 96(93, 97)ab | 95(93, 96)b | 0.405 |  |  |
| 12-Month | 96(95, 98)bcd | 95(93, 97)bc | 0.077 |  |  |
| **ROSS class I/II/III,n(%)** |  |  |  |  |  |
| Baseline | 119(36.4)/201(61.5)/7(2.1) | 22(26.8)/51(62.2)/9(11.0) | 0.014 |  |  |
| 12-Month | 276(84.4)/51(15.6)/0(0.0)a | 59(72.0)/23(28.0)/0(0.0)a | 0.009 |  |  |

CI, confidence interval; LVEDVi, left ventricular end-diastolic volume indexed; LVEF, left ventricular ejection fraction; LV, left ventricular; GLS, global longitudinal strain; GWI, global work index; GCW, global contractive work; GWW, global waste work; GWE, global work efficiency.

a *P-*value <0.05 vs. Baseline.

b *P-*value <0.05 vs. 1-Month.

c *P-*value <0.05 vs. 3-Month.

*dP-*value <0.05 vs. 6-Month.
